# Supplementary material for: Relationships between temperaments, occupational stress, and insomnia among Japanese workers
Source: PLoS One. 2017 Apr 13;12(4):e0175346. doi: 10.1371/journal.pone.0175346 (PMC5391062; doi:10.1371/journal.pone.0175346)
Supplement: S1 Table — (XLSX) [file pone.0175346.s001.xlsx]

## Sheet: Sheet1
S1 Table. GJSQ scores, Temperaments and AIS scores by gender
			Gender
			Male (N=45)	Female (N=88)
		Range	Mean ± SD	Mean ± SD
GJSQ scores	Quantitative workload	(11–55)	35.4 ± 7.4	34.3 ± 7.5
	Job control	(16–80)	42.9 ± 13.0	41.6 ± 11.3
	Role conflict	(8–56)	28.2 ± 9.7	24.6 ± 7.1
	Role ambiguity	(6–42)	19.2 ± 5.1	18.4 ± 5.2
	Intragroup conflict	(8–40)	18.9 ± 5.5	19.5 ± 5.5
	Supervisors support	(4–20)	15.0 ± 3.3	15.7 ± 3.2
	Coworkers support	(4–20)	15.9 ± 3.0	16.2 ± 3.2
Temperaments	Depressive	(0–21)	8.5 ± 4.1	7.9 ± 3.1
	Cyclothymic	(0–21)	4.4 ± 4.5	4.4 ± 3.6
	Hyperthymic	(0–21)	5.2 ± 4.9	5.3 ± 3.9
	Irritable	(0-Male 21, Female 22)	2.8 ± 3.2	3.0 ± 3.3
	Anxious	(0–26)	5.7 ± 6.5	6.6 ± 4.8
AIS scores	total	(0–24)	4.6 ± 4.2	4.5 ± 3.3
GJSQ: Generic Job Stress Questionnaire
TEMPS-A: Temperament Evaluation of Memphis, Pisa, Paris, and San Diego-Auto questionnaire
AIS: Athens Insomnia Scale
