# Supplementary material for: Relationships between temperaments, occupational stress, and insomnia among Japanese workers
Source: PLoS One. 2017 Apr 13;12(4):e0175346. doi: 10.1371/journal.pone.0175346 (PMC5391062; doi:10.1371/journal.pone.0175346)
Supplement: S4 Table — (XLSX) [file pone.0175346.s004.xlsx]

## Sheet: Sheet1
Supporting Information .4 GJSQ scores, Temperaments and AIS scores by occupation
			Occupation
			Clerical (N=95)	Professional (N=38)
		Range	Mean ± SD	Mean ± SD
GJSQ scores	Quantitative workload	(11–55)	34.3 ± 7.4	35.8 ± 7.6
	Job control	(16–80)	41.8 ± 12.0	42.7 ± 11.7
	Role conflict	(8–56)	25.6 ± 8.2	26.3 ± 8.4
	Role ambiguity	(6–42)	18.8 ± 5.3	18.5 ± 4.9
	Intragroup conflict	(8–40)	19.1 ± 5.3	19.6 ± 5.9
	Supervisors support	(4–20)	15.4 ± 3.6	15.8 ± 2.3
	Coworkers support	(4–20)	16.2 ± 2.8	16.0 ± 3.8
Temperaments	Depressive	(0–21)	8.4 ± 3.5	7.2 ± 3.5
	Cyclothymic	(0–21)	4.8 ± 4.1	3.7 ± 3.9
	Hyperthymic	(0–21)	5.4 ± 4.5	5.0 ± 3.5
	Irritable	(0-Male 21, Female 22)	3.2 ± 3.4	2.2 ± 2.6
	Anxious	(0–26)	6.6 ± 5.7	5.5 ± 4.9
AIS scores	total	(0–24)	4.5 ± 3.5	4.6 ± 3.8
GJSQ: Generic Job Stress Questionnaire
TEMPS-A: Temperament Evaluation of Memphis, Pisa, Paris, and San Diego-Auto questionnaire
AIS: Athens Insomnia Scale
